# Supplementary material for: A Randomized Controlled Trial on the Effects of Aerobic and Coordinative Training on Neural Correlates of Inhibitory Control in Children
Source: PubMed Central journal article supplement (PMC6406880; doi:10.3390/jcm8020184), 2019-02-04
Supplement: jcm-08-00184-s001.pdf [file jcm-08-00184-s001.pdf]

**Table 1.** Example sessions for the aerobic training.

| <b>Example</b> | <b>Time</b> | <b>Exercise</b>       | <b>Material</b>                                     | <b>Remarks</b>                                                                                                                                                                                                                                                                                        |
|----------------|-------------|-----------------------|-----------------------------------------------------|-------------------------------------------------------------------------------------------------------------------------------------------------------------------------------------------------------------------------------------------------------------------------------------------------------|
| 1              | 10 min      | Tail catching         | Bands                                               | Children have to steal each other's tails. not allowed to stand against the wall.                                                                                                                                                                                                                     |
|                | 10–15 min   | Carp game             | dice, staked running field                          | The children play in groups of two. Everyone has a dice. The number on the dice determines the number of laps the partner has to run.                                                                                                                                                                 |
|                | 15–45 min   | Game of rounders      | ball, boxes, cones                                  | Additional condition: children can be caught if standing still on one spot. They have to always move along the edge.                                                                                                                                                                                  |
| 2              | 10 min      | Keep the basket full  | Balls and Box                                       | A top part of the box is turned upside down and filled with gymnastic balls. A player 1 stand at the top of the box and throw out as many balls as possible from the box. The other players return the balls to the box as quickly as possible.<br>If the box is completely empty player 1 has won. . |
|                | 10-15 min   | Formula 1             | Boxes are positioned upside down on rolling boards. | Two children together, one sitting in the box the other one sliding the vehicle around the course.<br>After 3 laps, drivers change. Each child should drive 3 times. The first to get to the finish line wins.                                                                                        |
|                | 15–45 min   | Construct-Deconstruct | Small boxes, ropes, medicine balls, etc.            | Using different objects one big device is built by each team on one side of the field.<br>The task is to deconstruct the big device as quickly as possible and reconstruct it on the opposite site of the field. Each Team member can only carry one object at a time!                                |

**Table 2.** Example sessions for the coordinative training.

| Example | Time      | Exercise                                   | Material                                                                        | Remarks                                                                                                                                                                                                                                                                                                                                                                                                                                                                                                                                                                                                                                                                                                                                                   |
|---------|-----------|--------------------------------------------|---------------------------------------------------------------------------------|-----------------------------------------------------------------------------------------------------------------------------------------------------------------------------------------------------------------------------------------------------------------------------------------------------------------------------------------------------------------------------------------------------------------------------------------------------------------------------------------------------------------------------------------------------------------------------------------------------------------------------------------------------------------------------------------------------------------------------------------------------------|
| 1       | 10 min    | Tail catching                              | Bands                                                                           | Additional task: Children who lost their tail, must stand on a Pad until they are set free by another child by means of running to laps around the trapped child. They are then allowed to grab a new band from the middle of the field very quickly making sure they are not caught. The one who collected the most tails wins. Small groups collecting points. Boy and girls are evenly split into groups.<br>1. station: basketball pitch<br>2. station: tennis balls into the box<br>3. station: bowling<br>4. station: one child stands on the box with an cone upside down in its hand ready to catch. The other student throws the tennis ball into to cone.<br>Station 5: different target are marked on the wall and must be hit with the balls. |
|         | 10–15 min | Hitting targets.                           | Balls, cones, box, target                                                       |                                                                                                                                                                                                                                                                                                                                                                                                                                                                                                                                                                                                                                                                                                                                                           |
|         | 15–45 min | Game of rounders with obstacles            | Benches, Togupads, cones for slalom                                             | Children stand on the Togupad or on a medicine ball balancing while playing rounders.                                                                                                                                                                                                                                                                                                                                                                                                                                                                                                                                                                                                                                                                     |
| 2       | 10 min    | Warm up passing the ball                   | Balls                                                                           | Two partners are moving through the hall passing the ball to each other.<br>Variant 1: After each pass turn around own body axis.<br>Variant 2: After each pass: squat jump<br>1. station: Pedalo-course. Cones mark course: drive through with the Pedalo.<br>2. station: coordination supervisor. design step and jumping sequence as a suggestion.<br>3. station: Togupads. Two opposite: passes to each other.<br>4. station: skipping. Different styles, forward backward, one-legged.<br>5. station: two children face each other on boxes. Pass balls in as many styles as possible. One-legged. Weak hand, from behind through the legs.                                                                                                          |
|         | 10–15 min | Obstacle course (each station about 4 min) | Cones, 2 Pedalos, coordination supervisor, Todupads, balls, ropes, boxes, balls | Two partners stand behind each other at a distance of about 3 meters. The rear throws the ball over the partner's head in a high arc allowing him to catch it after a single floor contact. After 2 to 5 minutes, partners change positions.<br>Important: it's all about team work not how far the ball goes.                                                                                                                                                                                                                                                                                                                                                                                                                                            |
|         | 15–45 min | Launch                                     | Balls                                                                           |                                                                                                                                                                                                                                                                                                                                                                                                                                                                                                                                                                                                                                                                                                                                                           |

**Table 3.** Results of the examination of gender-specific effects on the change in neurocognitive (P300 amplitude and latency) and behavioral measures of cognitive performance (reaction time and accuracy).

|                              | <b>Interaction</b>               | <b>df</b> | <b>Wilks' <math>\lambda</math></b> | <b>F</b> | <b>p</b> | <b><math>\eta^2</math></b> |
|------------------------------|----------------------------------|-----------|------------------------------------|----------|----------|----------------------------|
| <b>P300</b>                  | Time $\times$ sex                | 2, 28     | 0.973                              | 0.386    | 0.683    | 0.027                      |
|                              | Time $\times$ sex $\times$ group | 4, 56     | 0.982                              | 0.126    | 0.973    | 0.009                      |
| <b>Cognitive performance</b> | Time $\times$ sex                | 2, 30     | 0.907                              | 1.539    | 0.231    | 0.093                      |
|                              | Time $\times$ sex $\times$ group | 4, 60     | 0.917                              | 0.668    | 0.617    | 0.043                      |
